# Supplementary material
Source: PubMed Central journal article supplement (PMC6819107)
Supplement: jci-129-124231-s339.pdf [file jci-129-124231-s339.pdf]

## Supplementary Material

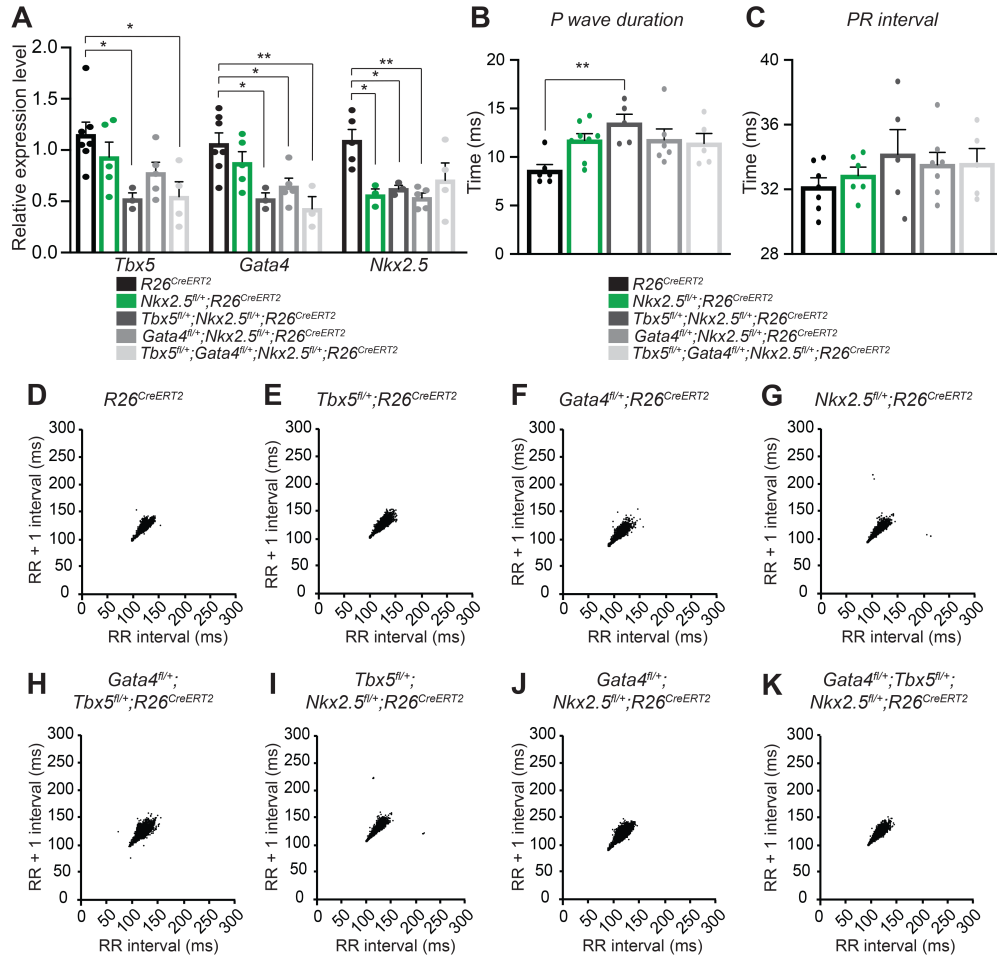

**Supplemental Figure 1. Combined *Gata4* (or *Tbx5*) and *Nkx2-5* haploinsufficiency does not affect adult atrial rhythm.** (A) Relative transcript expression by qPCR in the left atrium of *Nkx2.5* heterozygotes, *Tbx5/Nkx2.5* and *Gata4/Nkx2.5* compound heterozygotes and *Gata4/Tbx5/Nkx2.5* triple heterozygotes 2 weeks after TM treatment. Data are represented as means  $\pm$  SEM normalized to GAPDH and relative to *R26<sup>CreERT2</sup>* mice (set as 1) ( $n=5-7$  *R26<sup>CreERT2</sup>*,  $n=3-4$  *Nkx2.5<sup>fl/+</sup>;R26<sup>CreERT2</sup>*,  $n=3-4$  *Tbx5<sup>fl/+</sup>;Nkx2.5<sup>fl/+</sup>;R26<sup>CreERT2</sup>*,  $n=4$  *Gata4<sup>fl/+</sup>;Nkx2.5<sup>fl/+</sup>;R26<sup>CreERT2</sup>* and  $n=4$  *Tbx5<sup>fl/+</sup>;Gata4<sup>fl/+</sup>;Nkx2.5<sup>fl/+</sup>;R26<sup>CreERT2</sup>*). Experiments were performed in technical duplicates. *P* value was determined by one-way ANOVA followed by post-hoc Tukey test; \**P* < 0.05 was considered significant. (B, C) *P*-wave duration and PR interval calculated from ambulatory telemetry ECG recordings from *R26<sup>CreERT2</sup>* ( $n=12$ ), *Nkx2.5<sup>fl/+</sup>;R26<sup>CreERT2</sup>* ( $n=8$ ), *Tbx5<sup>fl/+</sup>;Nkx2.5<sup>fl/+</sup>;R26<sup>CreERT2</sup>* ( $n=5$ ), *Gata4<sup>fl/+</sup>;Nkx2.5<sup>fl/+</sup>;R26<sup>CreERT2</sup>* ( $n=4$ ) and *Gata4<sup>fl/+</sup>;Tbx5<sup>fl/+</sup>;Nkx2.5<sup>fl/+</sup>;R26<sup>CreERT2</sup>* ( $n=5$ ) mice. *P* values were determined ANOVA followed by post-hoc Tukey test. (D-G) Representative Poincaré plot of RR interval (RR<sub>n</sub>) against the subsequent beat (RR<sub>n</sub> + 1) ( $n=7$  for *R26<sup>CreERT2</sup>*,  $n=5$  *Tbx5<sup>fl/+</sup>;R26<sup>CreERT2</sup>*,  $n=6$  *Gata4<sup>fl/+</sup>;R26<sup>CreERT2</sup>*,  $n=6$  *Nkx2.5<sup>fl/+</sup>;R26<sup>CreERT2</sup>*,  $n=7$  *Gata4<sup>fl/+</sup>;Tbx5<sup>fl/+</sup>;R26<sup>CreERT2</sup>*,  $n=5$  *Tbx5<sup>fl/+</sup>;Nkx2.5<sup>fl/+</sup>;R26<sup>CreERT2</sup>*,  $n=6$  *Gata4<sup>fl/+</sup>;Nkx2.5<sup>fl/+</sup>;R26<sup>CreERT2</sup>* and  $n=5$  *Gata4<sup>fl/+</sup>;Tbx5<sup>fl/+</sup>;Nkx2.5<sup>fl/+</sup>;R26<sup>CreERT2</sup>* mice).

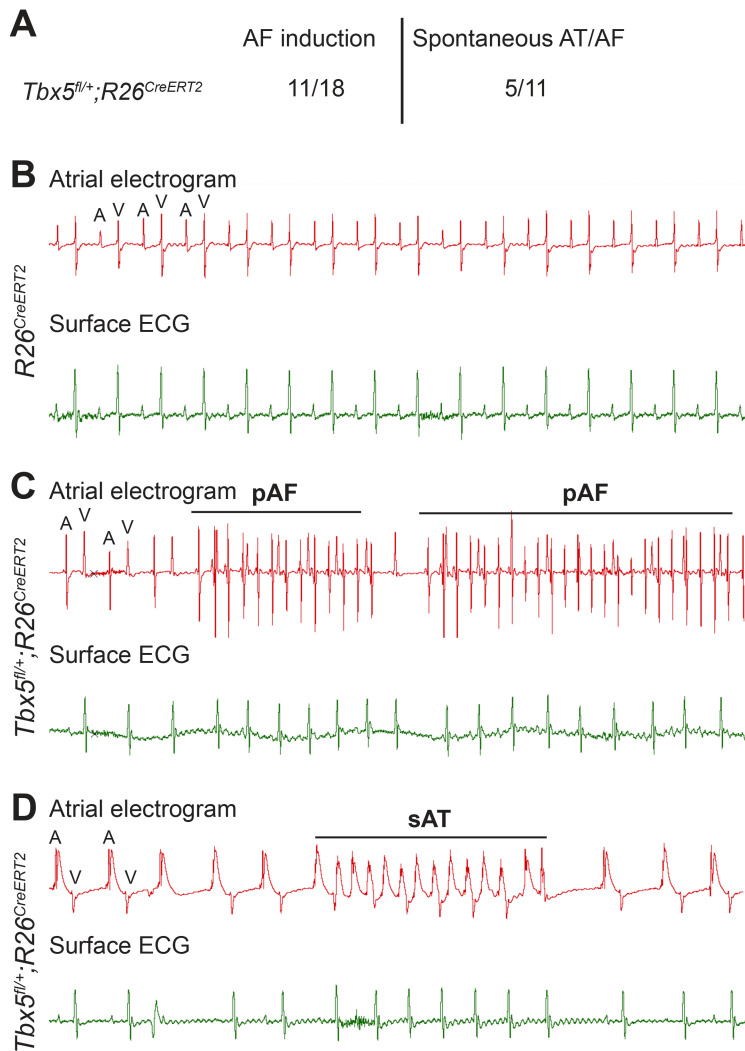

**Supplemental Figure 2. Adult *Tbx5* heterozygotes have spontaneous atrial arrhythmias under anesthesia.** (A) Pacing induction by intra-atrial pacing of *Tbx5<sup>fl/+</sup>;R26<sup>CreERT2</sup>* mice showing episodes of spontaneous AF or AT. 5 of 11 (45%) *Tbx5<sup>fl/+</sup>;R26<sup>CreERT2</sup>* mice developed spontaneous atrial arrhythmias (B-D) Intracardiac atrial electrogram recordings and corresponding surface ECG of *R26<sup>CreERT2</sup>* (B), and *Tbx5<sup>fl/+</sup>;R26<sup>CreERT2</sup>* mice (C, D) with paroxysmal AF (C) or spontaneous atrial tachycardia (D) 2 weeks post-TM treatment. Paroxysmal AF was observed in 3 of 11 and *Tbx5<sup>fl/+</sup>;R26<sup>CreERT2</sup>* mice while spontaneous AT occurred in 2 of 11 *Tbx5<sup>fl/+</sup>;R26<sup>CreERT2</sup>* mice. A, atrial electrical signal; AF, atrial fibrillation; AT, atrial tachycardia; pAF, paroxysmal AF; sAT, spontaneous atrial tachycardia; V, far field ventricular electrical signal.

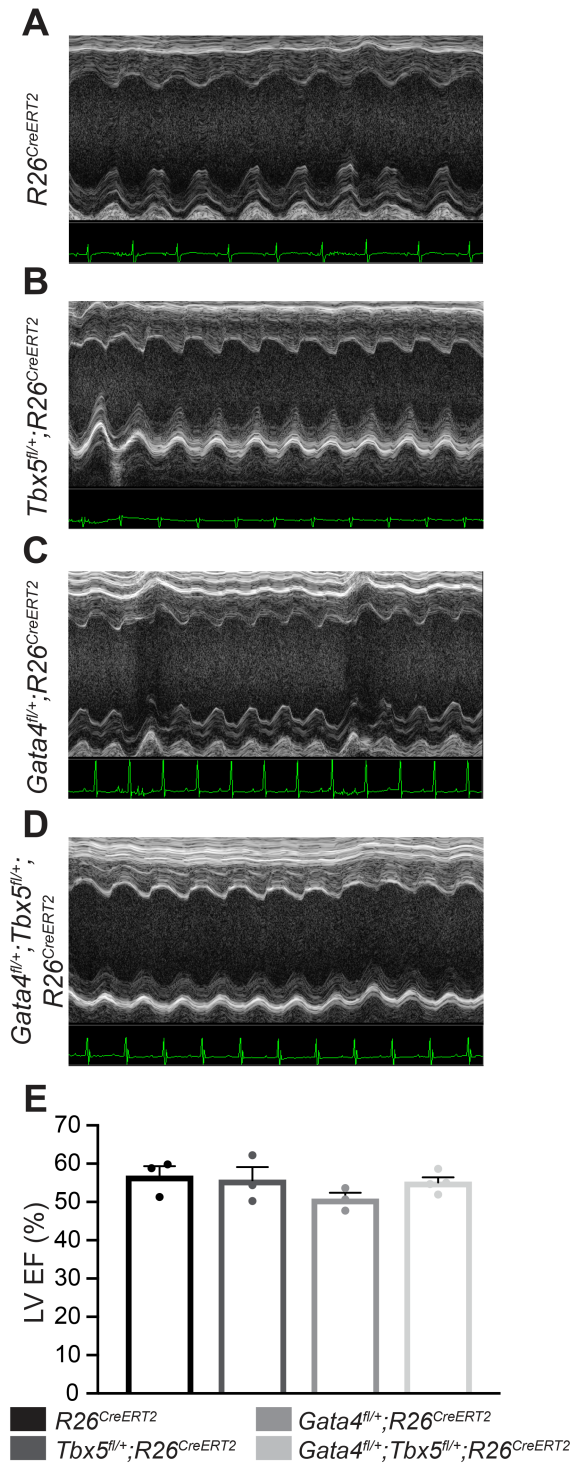

**Supplemental Figure 3. Left ventricular function of  $Tbx5^{fl/+};R26^{CreERT2}$  adult mice is not changed.** (A-D) M-mode echocardiography from  $R26^{CreERT2}$  (A),  $Tbx5^{fl/+};R26^{CreERT2}$  (B),  $Gata4^{fl/+};R26^{CreERT2}$  (C) and  $Tbx5^{fl/+};Gata4^{fl/+};R26^{CreERT2}$  (D) mice 2 weeks post-TM treatment. Surface ECGs are represented at the bottom.  $N = 3-4$  mice per genotype. (E) Left ventricular ejection fraction (LVEF) was calculated from the M-mode images.  $P$  values were calculated from ANOVA followed by post-hoc Tukey test.

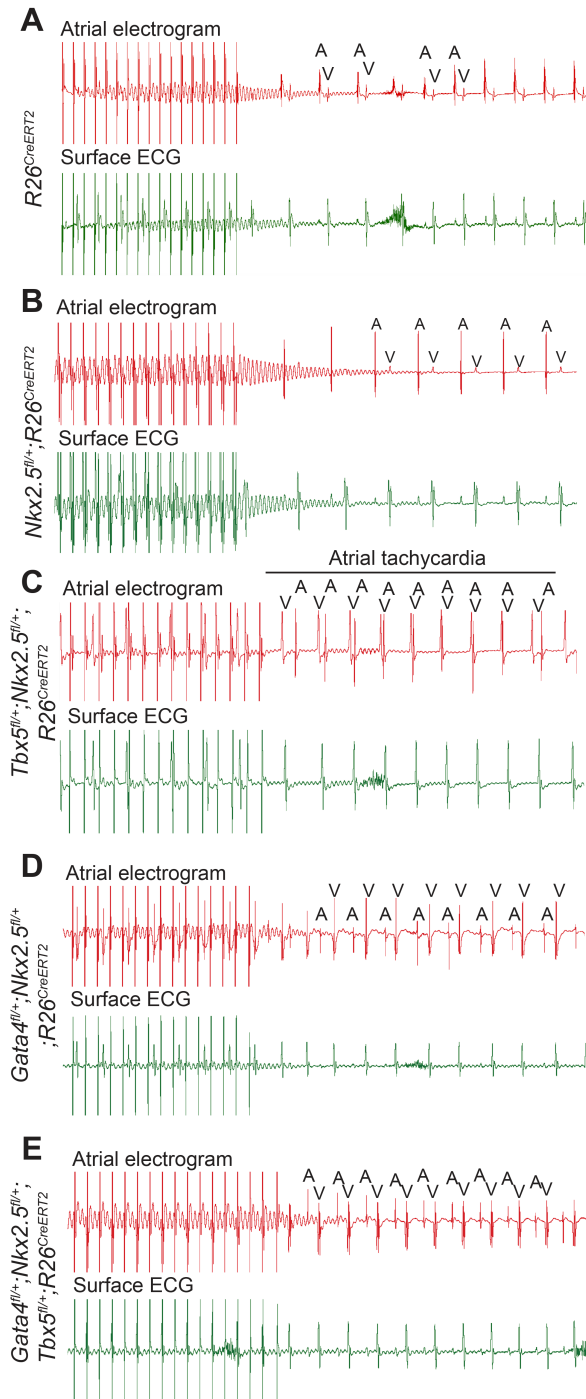

**Supplemental Figure 4. Combined *Gata4* (or *Tbx5*) and *Nkx2.5* haploinsufficiency does not increase susceptibility to AF. (A-F)** Intracardiac atrial electrogram recordings and corresponding surface ECG of  $R26^{CreERT2}$  ( $n=9$ ),  $Nkx2.5^{fl/+}; R26^{CreERT2}$  ( $n=8$ ),  $Tbx5^{fl/+}; Nkx2.5^{fl/+}; R26^{CreERT2}$  ( $n=8$ ),  $Gata4^{fl/+}; Nkx2.5^{fl/+}; R26^{CreERT2}$  ( $n=12$ )  $Gata4^{fl/+}; Tbx5^{fl/+}; Nkx2.5^{fl/+}; R26^{CreERT2}$  ( $n=6$ ) mice. A, atrial electrical signal; V, far field ventricular electrical signal. (F) Pacing induction by intra-atrial pacing of mice in A-H. *P* values were determined by Fisher's exact test; \**P* < 0.05 and \*\**P* < 0.01.

**F**

|                                                           | AF induction |
|-----------------------------------------------------------|--------------|
| $R26^{CreERT2}$                                           | 0/9          |
| $Nkx2.5^{fl/+}; R26^{CreERT2}$                            | 1/8          |
| $Tbx5^{fl/+}; Nkx2.5^{fl/+}; R26^{CreERT2}$               | 3/8          |
| $Gata4^{fl/+}; Nkx2.5^{fl/+}; R26^{CreERT2}$              | 1/12         |
| $Gata4^{fl/+}; Nkx2.5^{fl/+}; Tbx5^{fl/+}; R26^{CreERT2}$ | 0/6          |

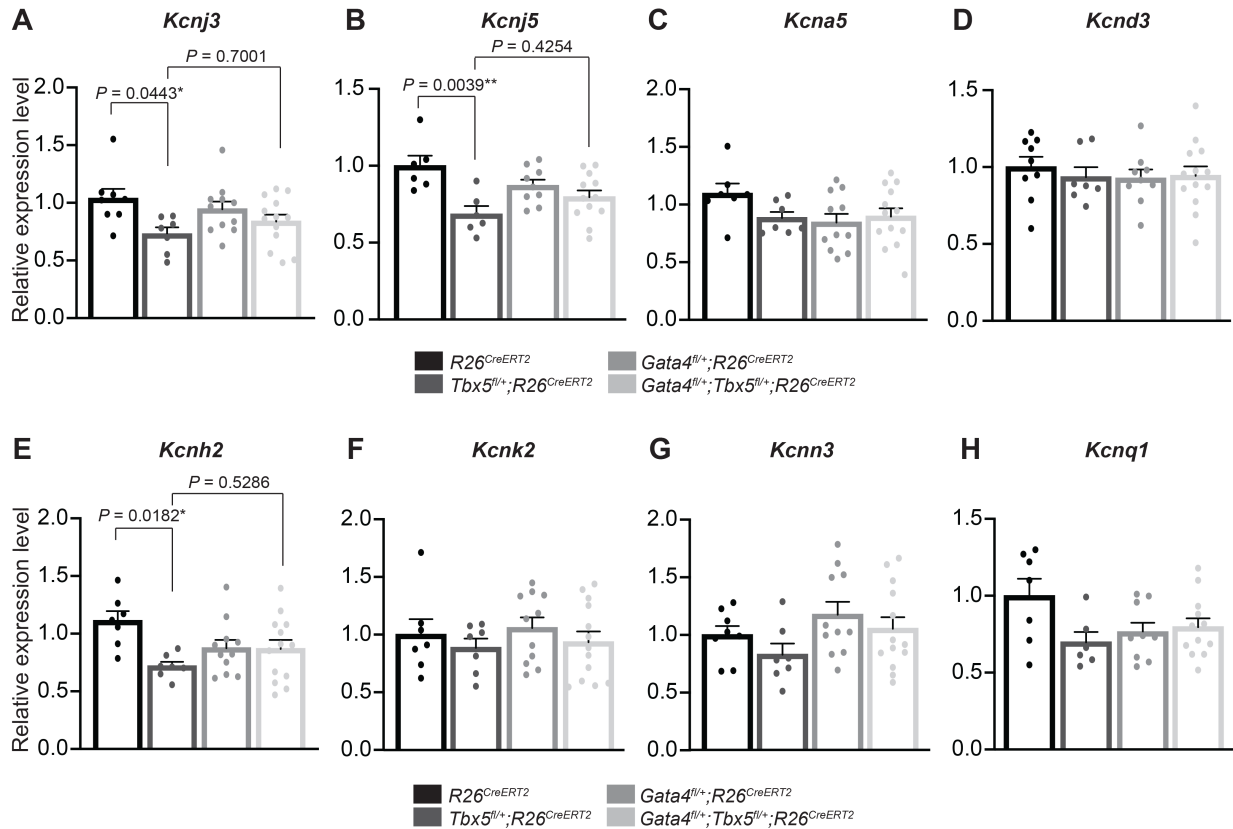

**Supplemental Figure 5. Decreased expression of potassium channels in *Tbx5* heterozygotes is not rescued by *Gata4* haploinsufficiency.** (A-H) Relative transcript expression by qPCR of known AF potassium genes from left atrium of *R26<sup>CreERT2</sup>* ( $n=6$ ) *Tbx5<sup>fl/+</sup>;R26<sup>CreERT2</sup>* ( $n=5$ ), *Gata4<sup>fl/+</sup>;R26<sup>CreERT2</sup>* ( $n=7$ ) and *Gata4<sup>fl/+</sup>;Tbx5<sup>fl/+</sup>;R26<sup>CreERT2</sup>* ( $n=9$ ) mice 2 weeks after TM treatment. *Tbx5<sup>fl/+</sup>;R26<sup>CreERT2</sup>* mice showed a 20-30% reduction in *Kcnj3*, *Kcnj5* and *Kcnh2* gene expression, and was not normalized in *Gata4<sup>fl/+</sup>;Tbx5<sup>fl/+</sup>;R26<sup>CreERT2</sup>* mice. Data are normalized to GAPDH and relative to *R26<sup>CreERT2</sup>*. *P* values were analyzed with one-way ANOVA followed by post-hoc Tukey test.

TBX5

GTACAATGAAATCAGACAGAGGTGTTCTGACGAAATGTTGATGGATGGGACACTAAGGTGCTAAGGTAA  
ATATAAGAGAAGCATATAGGCACTGTGTGTGTCCGAGTCCACTTCCCAGTAAGCATGCATATACAGGCAC  
TTCACAGACAGACCACCAGAGGCTAGGCAGCGATCGTGGTGGCTTTTCTTCCCCTTTATAGTTTAGTGT  
ATTTGAAACAGAAATTTTTTTTCCAAAAACCTGGTGTGGGGAAAGTGTACCCTGTGAACTGTGCCCTCC  
TBX5  
GGCTGCCTGCCAACAGTTTGGTTTCTGTTGGTGTCATCCACAGCGAGCCCAGTCGCCCTGCACGGCC  
TBX5  
AAGGTGTCCTGTGAAATATATAGACCAGGGTCAGCTCGGCTCACAGGGTCCGATGGCCTCAGCAGACCTT  
GATA4      GATA4  
TCCGGGGGGGTGAGGGGTGGCGCACTGCCATGGGGCAATTATCTCCAGGAGATAGGGACGATGGACAAGCA  
TBX5  
CTTTACTGCAGAGAGGTGATCCAAGCAGGCTTGGTCGGTCGAGGGAAAGGAGGCTAGGACACATTCATT  
AAGGAATTTCACTCCTCCCTCCCTCCAGCCCGTCATCGTCGTTTTCTCTATCCCCTGAACAGAAATAT  
GATA4  
ATTTAGCAACCCTATCTAAACCCTCTCCTTTCCCTTAATTTGATTAAGGAGCTGAGGGAACAAAACCAGA  
GATGGGTGGGGGCTTGGGGAGGGGGTCAGGAGCGGGTGGTTAAGCTGTGGCGAGTGATTAGGGGAGCTGG  
CTGCCATCTCAGGCAGGTGAGGCTTAAGTGTGGACAGCCCCAGTGCCTCCTGGTACTCTGTAAAGAGGC  
GATA4  
ACCGAGGACCCAGGGAGGGAACATTTATCAGGGAATGCTCTTCTCTGGGAAAATGTGAACCAAACCAGA  
GGGGTCAAGCCTCAAGGATTAGCTCAGACAATGGGGCCTACTAACACAGGACACCAGCTTCTTTCCCA  
GTCTCTGCCTCCCTGGAACCTCAGTCTTCAGGGCTTCCCAGAGGCTGCGCAGTTTGAACCTCTGGGGCTT  
TAATGGCTCGCACCTACCTACCTACCTACCTACCTACCTACCTACCTACCTACCGATCTACCT

**Supplemental Figure 6. Nucleotide sequence of the 5'-upstream region of the mouse *Atp2a2* gene.** *Atp2a2* enhancer located 19Kb upstream of the start site (mm9 Chr5: 122970476-122971591) with GATA and TBX canonical binding sites shown in blue and green.

AGAGGGTCCCAAAGGAACACATCCTATCGCCGGAGCAAGACGAGCAGCTGCTAGGTTGACGGGACAATCA  
 TCACATACCTTCCCTTGTCCCTTTCCTCCCGTCTCCAGGAGCTCACACGTGCTTCTCTTTACCCAGCAG  
 CAAGACACTATTCTTTACATTATTAGCATCCTGAGTTTCTGGACCTCCCTGTTGGAGACAACAGGACAAC  
 AGCACCAGCTGATTTCTAAGGCCATTTCTTGATTCAGTGTGGACTTTGTCAGCTACAATGGGAAGCCAG  
 GAAGTGACACCGAGGGTCATTCATACCAGTAAGACCCATCATGAGGGAAAACCTTATACTGGTATTTGGT  
 CCATCACAATGGCCAAAATACGTGGCATGAACAACCTAAAAATAAACTATTGGCTTCTAGATCCAGAG  
 GTTTCAGTGTAGGACAGCAGGGCAGGCAGAGAGGAGGCTTGGTCCAGAGCAACAGTAGTCTGTAGCAA  
 AGTTTGCTCATGTGGTAGGAGACTAGGAAACAGAGAACGGGGCCAGAACTCAGGGCTGAGTATTACCTTT  
 AAAAGCCCACCCCTATTCCATTTACCAGGTAGGCCCTAACTCCTAAAGGTCCCATGCCCCAGCAAATAG  
 TGCCATCATCCAGGGAACAATCATTTAAAGCATAAGCCTATGGGGACATTTTAGATCCAAACCACGATAC  
 TCCTTTTCCCTCCCCCTCCATGCATCTCCTGTGTCTGCATACATACAGAACCAAGTTCTGGACACTG  
 GATA4  
 AGAATGCCCAAGTCTGAGACCTCCGTGGAAGATAAAGTTGGGATTACAGCTATTTTCTTAATTTCTTA  
 TCCATTGGGAATCTGGTTTGGGGTTCATTTGAATAGGACCTAGGAAGTAGATATGGGATGACAGACTC  
 TBX5  
 CCTCCTTTGAAAGCACTCACAAGTCAATAAAGAATAGAGATCAGCAACTCCATGGCAGTGAGGTGTGTGC  
 TTAATCTAGTGATATCCAGAGAGGCTGTGCCCTGCCACATACCAGAGCCCTGCAGAACAAGACCCACAGG  
 GATA4  
 ACTTTGCTGATAAGGACAAGAGGCTTAGCAGTGACAAATCGTGACGCACATCATTTATCTTCATGACCCCA  
 TGCTGCAAAGCAGCTCTACTACACTGAAGGAACTTACTGTAACTGTACTGGTTGCATTTGTCACTG  
 AGAAGCCCCGTGGGATACCCTGGGCTCCTGTGTTTCCCTACTAGGCAATGAAGATCATGCCTTCTCCA  
 TCTCTGGAAGGACGACTGTGAGATTTAACTACTCAACCTTCTCTGTGTGTCTCTCTGACTTTGTCTCTGT  
 CCTCCTGCCCCAGTTACTCTCAGATCTACCATCCAGGAGAAGAGGGCTCTGTCTGCTCCCTGGGCACTGG  
 CTATGCTGGAGGGTCAGGAGGCAAAAGGAGTCTGCAAACATCTAGAAAGCATCAGAGAAAACCACTACTGG  
 GTTTTGCTTGTCTACAGGGCAGTGGTGGTCACGGAAAATGAAAAATTAATTAGGAGAACATGACTGCTG  
 GATTTCCCTTTATTCTTGAACCAAATCAAATCAATACAGTTCTCAGATCCTGCCAATAAAAGGCAAAGACC  
 GATA4  
 TAATTGTGCCTGACTTGGGAAGTCCCAAGAAACAGAACCACAAGATATCTAGGGCAGGACAGAGATAAGG  
 CAATCCTAAGAGCCCAGTGACCAGCTTGGCTAGCTGGAATAGCAAACCTTTATACTCAGTGAGAGACCCTG  
 TBX5  
 ACCTCCCCACCCCTCCGTACACCAATTAAAAACAAAAAAGAAGTGGATGGCTATGAGGATGACATCGT  
 GGTTAAGCCTAAGTGTGAAGACTAAAGCTTGGAGCCTTCCCTTGGAAAGATCCAGAGCATATCCTTGAG

**Supplemental Figure 7. Nucleotide sequence of the 5'-upstream region of the mouse *Ryr2* gene.** *Ryr2* enhancer located 24Kb upstream of the start site (mm9 Chr13: 12223550-12226563) with GATA and TBX canonical binding sites shown in blue and green.

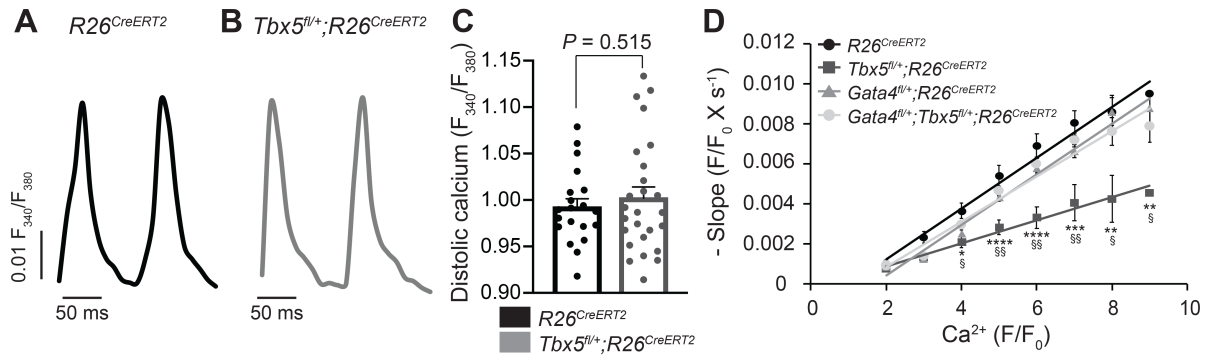

**Supplemental Figure 8. Diastolic calcium levels are unaltered in *Tbx5<sup>fl/+</sup>;R26<sup>CreERT2</sup>*.** (A, B) Representative diastolic calcium traces after Fura-2 AM staining. (C)  $[Ca]_i$ , determined by dividing fluorescence emission following 340 nm excitation by 380 nm excitation, was unchanged in *Tbx5<sup>fl/+</sup>;R26<sup>CreERT2</sup>* compared to littermate controls ( $n = 3$  mice per genotype). (D) SERCA activity was decreased at all levels of calcium *Tbx5<sup>fl/+</sup>;R26<sup>CreERT2</sup>* compared to littermate controls and normalized in *Gata4/Tbx5* compound heterozygotes.  $P$  values were calculated using an ANOVA followed by post-hoc Tukey test. (\* *Tbx5<sup>fl/+</sup>;R26<sup>CreERT2</sup>* versus *R26<sup>CreERT2</sup>* mice; § *Tbx5<sup>fl/+</sup>;R26<sup>CreERT2</sup>* versus *Gata4<sup>fl/+</sup>;Tbx5<sup>fl/+</sup>;R26<sup>CreERT2</sup>* mice).



### Supplementary Tables

| Genotype                                           | Parameters     |                     |              |
|----------------------------------------------------|----------------|---------------------|--------------|
|                                                    | P-wave<br>(ms) | PR interval<br>(ms) | QRS<br>(ms)  |
| <i>R26<sup>CreERT2</sup></i>                       | 10.14 ± 1.07   | 32.15 ± 0.57        | 11.90 ± 0.25 |
| <i>Tbx5<sup>fl/+</sup>;R26<sup>CreERT2</sup></i>   | 14.19 ± 0.66** | 35.02 ± 1.15**      | 12.04 ± 0.32 |
| <i>Gata4<sup>fl/+</sup>;R26<sup>CreERT2</sup></i>  | 11.59 ± 0.75   | 31.64 ± 0.93        | 11.81 ± 0.29 |
| <i>Nkx2.5<sup>fl/+</sup>;R26<sup>CreERT2</sup></i> | 11.66 ± 0.72   | 33.80 ± 1.31        | 11.76 ± 0.26 |
| <i>Gata4/Tbx5</i>                                  | 13.23 ± 0.82   | 32.84 ± 1.49        | 12.51 ± 0.31 |
| <i>Tbx5/Nkx2.5</i>                                 | 13.48 ± 1.03   | 33.59 ± 1.22        | 12.31 ± 0.98 |
| <i>Gata4/Nkx2.5</i>                                | 11.78 ± 1.22   | 32.85 ± 0.57        | 12.45 ± 0.21 |
| <i>Gata4/Tbx5/Nkx2.5</i>                           | 10.40 ± 1.15   | 34.16 ± 1.70        | 12.51 ± 0.38 |

\*\**P*<0.01 compared to *R26<sup>CreERT2</sup>*.

*Gata4/Tbx5*, *Gata4<sup>fl/+</sup>;Tbx5<sup>fl/+</sup>;R26<sup>CreERT2</sup>*

*Tbx5/Nkx2.5*, *Tbx5<sup>fl/+</sup>;Nkx2.5<sup>fl/+</sup>;R26<sup>CreERT2</sup>*

*Gata4/Nkx2.5*, *Gata4<sup>fl/+</sup>;Nkx2.5<sup>fl/+</sup>;R26<sup>CreERT2</sup>*

*Gata4/Tbx5/Nkx2.5*, *Gata4<sup>fl/+</sup>;Tbx5<sup>fl/+</sup>;Nkx2.5<sup>fl/+</sup>;R26<sup>CreERT2</sup>*

**Supplemental Table 1. Conscious ambulatory telemetry parameters.** Conscious ambulatory telemetry ECG parameters obtained from *Tbx5*, *Gata4* and *Nkx2.5* adult heterozygotes, *Gata4/Tbx5*, *Tbx5/Nkx2.5* and *Gata4/Nkx2.5* compound heterozygotes and *Gata4/Tbx5/Nkx2.5* triple heterozygotes 2 weeks after receiving TM. Values are mean ± standard error the mean obtained from *R26<sup>CreERT2</sup>* (*n*=12), *Tbx5<sup>fl/+</sup>;R26<sup>CreERT2</sup>* (*n*=5), *Gata4<sup>fl/+</sup>;R26<sup>CreERT2</sup>* (*n*=6), *Nkx2.5<sup>fl/+</sup>;R26<sup>CreERT2</sup>* (*n*=8), *Gata4<sup>fl/+</sup>;Tbx5<sup>fl/+</sup>;R26<sup>CreERT2</sup>* (*n*=8), *Tbx5<sup>fl/+</sup>;Nkx2.5<sup>fl/+</sup>;R26<sup>CreERT2</sup>* (*n*=5), *Gata4<sup>fl/+</sup>;Nkx2.5<sup>fl/+</sup>;R26<sup>CreERT2</sup>* (*n*=4) and *Gata4<sup>fl/+</sup>;Tbx5<sup>fl/+</sup>;Nkx2.5<sup>fl/+</sup>;R26<sup>CreERT2</sup>* (*n*=5) mice.

| Genotype                                          | Parameters               |               |                |              |                     |
|---------------------------------------------------|--------------------------|---------------|----------------|--------------|---------------------|
|                                                   | $dV/dt_{max}$<br>(mV/ms) | RMP (mV)      | APA (ms)       | APD50 (ms)   | APD90 (ms)          |
| <i>R26<sup>CreERT2</sup></i>                      | 221.52 ± 23.29           | -76.3 ± 2.55  | 133.89 ± 2.49  | 9.46 ± 1.32  | 71.33 ± 11.24       |
| <i>Tbx5<sup>fl/+</sup>;R26<sup>CreERT2</sup></i>  | 157.44 ± 14.15           | -77.15 ± 1.46 | 128.27 ± 4.57  | 13.33 ± 2.24 | 172.44 ± 26.08**††† |
| <i>Gata4<sup>fl/+</sup>;R26<sup>CreERT2</sup></i> | 147.73 ± 19.88           | -77.53 ± 1.55 | 121.51 ± 5.22* | 10.08 ± 2.42 | 66.04 ± 13.28       |
| <i>Gata4/Tbx5</i>                                 | 170.41 ± 18.85           | -79.50 ± 0.21 | 136.01 ± 5.17  | 9.90 ± 1.67  | 68.22 ± 14.15       |

**Supplemental Table 2. Action potential parameters of adult-specific *Tbx5<sup>fl/+</sup>;R26<sup>CreERT2</sup>*, *Gata4<sup>fl/+</sup>;R26<sup>CreERT2</sup>* and *Gata4/Tbx5* compound haploinsufficiency.** Single cell electrophysiology parameters obtained from *Tbx5* and *Gata4* adult heterozygotes as well as *Gata4/Tbx5* compound heterozygotes and *Gata4/Tbx5/Nkx2.5* triple heterozygotes 2 weeks after receiving TM. Values are mean ± standard error the mean obtained from *R26<sup>CreERT2</sup>* (n=9), *Tbx5<sup>fl/+</sup>;R26<sup>CreERT2</sup>* (n=14), *Gata4<sup>fl/+</sup>;R26<sup>CreERT2</sup>* (n=10) and *Gata4<sup>fl/+</sup>;Tbx5<sup>fl/+</sup>;R26<sup>CreERT2</sup>* (n=13). APA, Action potential amplitude; APD50, action potential at 50% repolarization; APD90, Action potential at 90% repolarization; RMP, resting membrane potential

| Gene           | Primers                  |                          |
|----------------|--------------------------|--------------------------|
|                | Forward                  | Reverse                  |
| <i>Tbx5</i>    | GGCATGGAAGGAATCAAGGT     | CTAGGAAACATTCTCCTCCCTGC  |
| <i>Gata4</i>   | AAACGGAAGCCCAAGAACCTGAAT | GAGCTGGCCTGCGATGTCTAGGTG |
| <i>Nkx2.5</i>  | ACATTTTACCCGGGAGCC       | GGCTTTGTCCAGCTCCAC       |
| <i>Ryr2</i>    | CAAATCCTTCTGCTGCCAAG     | CGAGGATGAGATCCAGTTCC     |
| <i>Atp2a2</i>  | CTGGTGATATAGTGGAATTGCTG  | GGTCAGGGACAGGGTCAGTA     |
| <i>Sn</i>      | CTGAGGTCCTTGGTAGCCTG     | GGTGTGTCAGGCATTGTGAG     |
| <i>NCX</i>     | TTCTCATACTCCTCGTCATCG    | TTGAGGACACCTGTGGAGTG     |
| <i>CamK2B</i>  | ACCCTCTACTTTCTCTCCTCC    | ACTTTGGTGTCTTCGTCCTC     |
| <i>Pln</i>     | TTATGCCAGGACGGCAAAG      | CACTGTGACGATCACCGAAG     |
| <i>Cacna1c</i> | CTACAGAAACCCATGTGAGCAT   | CAGCCACGTTGTCAGTGTTG     |
| <i>Kcnj3</i>   | GCTGGCAACTACACTCCCTG     | AACATGCAGCCGATGAGGAA     |
| <i>Kcnj5</i>   | TGTAAGAGCTCCGTGCTTGG     | TGTGGAGATGTCTCGTGCTC     |
| <i>Kcna5</i>   | AAAATTGGAGACGATGACGG     | ATGAGGCCCATCACTGTAGG     |
| <i>Kcnd3</i>   | GGGTGGCAGGCAGGTTAGA      | CCTGCTGCTCCCGTCGTA       |
| <i>Kcnh2</i>   | ATGGCTCAGATCCAGGCAGTTA   | CAAGGAGAGCGGTCAGGTAATG   |
| <i>Kcnk2</i>   | TGGCTACGGGTGATCTCTAAG    | GCTGGAACTTGTCGTAGATCTC   |
| <i>Kcnn3</i>   | CAAGAATGCCGCCGCCAATGTC   | CCAGGCTGCCAATCTGCTTTTC   |
| <i>Kcnq1</i>   | GAGGATAGGAGGCCAGACCA     | AAGTACTGCATGCGCCTGAT     |

**Supplemental Table 3. Quantitative PCR primers used.**
